# Supplementary material for: Dynamic and migration characteristics of soil free amino acids during the whole growth period of rice after application of milk vetch
Source: Copernicus journal article supplement (doi:10.5194/soil-2021-130), 2021-12-03
Supplement: Supplementary file 1 [file Supplementary material.doc]

**Supplementary material**

**Dynamic and migration characteristics of soil free amino acids during the whole growth period of rice after application of milk vetch**

Jing Yanga, Yi Lina, Christopher Rensing a, Liming Zhanga,b, Biqing Zhoua,b, Shihe Xinga,b*, Wenhao Yanga,b*

*a College of Resources and Environment, Fujian Agriculture and Forestry University, Fuzhou 350002, China*

*b Fujian Provincial Key Laboratory of Soil Environmental Health and Regulation, Fuzhou 350002, China*

**1、Analysis of components of [C](https://dict.youdao.com/w/eng/chinese_milk_vetch/" \l "keyfrom=dict.phrase.wordgroup)hinese milk vetch**

**Fig.S1.** Acidolysis amino acids content (a) and infrared spectra(b) of the tested Chinese milk vetch

The content of acid hydrolyzed amino acids in Chinese milk vetch(CMV) was 82.35 mg kg-1. In terms of acid-hydrolyzed amino acid composition, the contents of aspartic acid and glutamate in CMV were higher, which were 10.60 mg kg-1 and 10.15 mg kg-1, respectively. There were 9 obvious absorption peaks in the infrared spectrum of CMV. Peak 1 appears at 3277 cm-1(N-H stretching vibration of amide functional groups and -OH of carbohydrates, carboxylic acids, phenols, etc.), peak 2 appears at 2719 cm-1(stretching vibration of - CH3, - CH2 in aliphatic and alicyclic groups), peak 3 appears at 2851 cm-1 (stretching vibration of -CH2 in carbohydrate), peak 4 appears at 1730 cm-1 (the C=O stretching vibration of the lipid carbonyl group in fatty acid compounds), peak 5 appears at 1625 cm-1 (the C = O stretching vibration connected with aromatic ring and the C = O stretching vibration of amide compound in lignin, namely the amide I absorption band), peak 6 appears at 1413 cm-1(Lignin, aliphatic compounds and C-N stretching vibration, namely amide III absorption band), peak 7 appears at 1370 cm-1(the methyl group in lipids), peak 8 appears at 1242 cm-1(the C-O stretching vibrations in phenolic, cellulose esters and acetate compounds), peak 9 appears at 1028 cm-1 (the Si-O stretching vibration, C-O stretching vibration, carbohydrate or polysaccharide).

**2 The information amino acid standard**

Table S1 Concentration of amino acid standard

| Amino acids | Abbreviation | Molarity  umol mL-1 | Wavelength  nm |
| --- | --- | --- | --- |
| Phosphoserine | Phser | 0.5 | 570 |
| Taurine | Taur | 0.5 | 570 |
| Phosphoethanolamine | Pea | 0.5 | 570 |
| Urease | urease | 0.5 | 570 |
| Aspartic acid | Asp | 0.5 | 570 |
| Hydroxyproline | Hypro | 0.5 | 440 |
| Threonine | Thr | 0.5 | 570 |
| Serine | Ser | 0.5 | 570 |
| Asparagine | Asn | 0.5 | 570 |
| Glutamate | Glu | 0.5 | 570 |
| Sarcosine | Sarc | 0.5 | 570 |
| a-aminoadipate | Aaaa | 0.5 | 570 |
| Proline | Pro | 0.5 | 440 |
| Glycine | Gly | 0.5 | 570 |
| Alanine | Ala | 0.5 | 570 |
| Citrulline | Citr | 0.5 | 570 |
| a-aminobutyric acid | Aaba | 0.5 | 570 |
| Valine | Val | 0.5 | 570 |
| Cystine | Cys | 0.25 | 570 |
| Methionine | Met | 0.5 | 570 |
| Cystathionine | Cysth | 0.5 | 570 |
| Isoleucine | Ile | 0.5 | 570 |
| Leucine | Leu | 0.5 | 570 |
| Tyrosine | Tyr | 0.5 | 570 |
| b-alanine | Bala | 0.5 | 570 |
| Phenylalanine | Phe | 0.5 | 570 |
| b-aminoisobutyric acid | Baiba | 0.5 | 570 |
| Homocysteine | Homocys | 0.5 | 570 |
| g-aminobutyric acid | Gaba | 0.5 | 570 |
| Ethanolamine | Ethan | 0.5 | 570 |
| Ammonia | Amm | 0.5 | 570 |
| Hydroxylysine | Hylys | 0.5 | 570 |
| Ornithine | Orn | 0.5 | 570 |
| Lysine | Lys | 0.5 | 570 |
| 1-methylhistidine | 1-mhis | 0.5 | 570 |
| Histidine | His | 0.5 | 570 |
| Tryptophan | Trp | 0.5 | 570 |
| 3-methylhistidine | 3-mhis | 0.5 | 570 |
| Anserine | Ans | 0.5 | 570 |
| Carnosine | Car | 0.5 | 570 |
| Arginine | Arg | 0.5 | 570 |

**Fig.S2** Standard spectrum of free amino acids

**3 Performance of structural equation model**


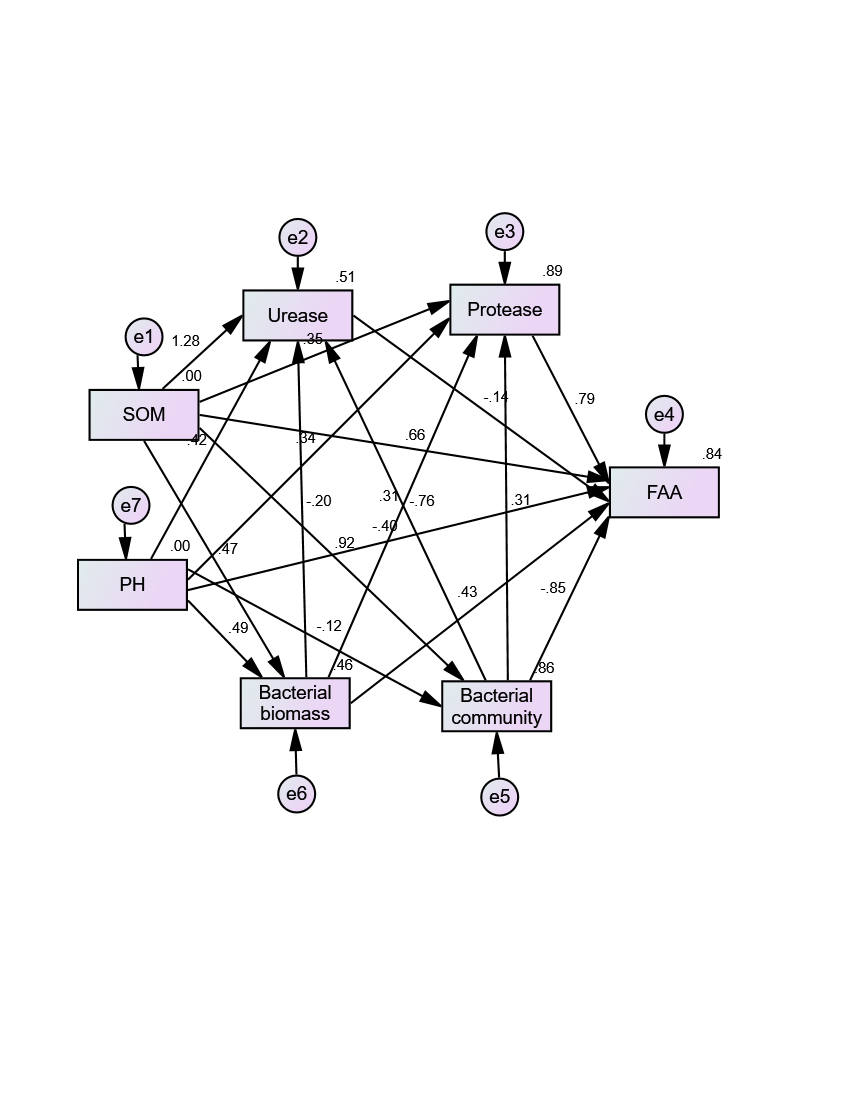


**Fig.S3.** Conceptual model demonstrating the relationship between FAAs and its impact factors

Some hypotheses could be made as follows:

i) pH, SOM, protease, urease, MBN, bacterial biomass and bacterial community have a direct impact on FAAs

ii)Bacterial biomass can have an indirect effect on FAAs through SOM, protease, urease

iii)Bacterial community can have an indirect effect on FAAs through SOM, protease, urease

iv)pH can have an indirect effect on FAAs through protease, urease, bacterial biomass, bacterial community

v)SOM can have an indirect effect on FAAs through protease, urease, bacterial biomass, bacterial community

**Table S2** Estimates of conceptual model coefficients for FAAs and its impact factors

| Item | Estimate a) | S.E.b) | C.R. c) | Pd) |
| --- | --- | --- | --- | --- |
| bacterial biomass<---SOM | 10045610.972 | 2527473.198 | 3.975 | *** |
| bacterial community<---SOM | 0.971 | 0.065 | 15.043 | *** |
| bacterial biomass<---pH | 133198688.758 | 31844847.118 | 4.183 | *** |
| bacterial community<---pH | -1.627 | 0.814 | -2.000 | .045 |
| urease<---SOM | -.115 | 0.060 | -1.917 | *** |
| protease<---SOM | 0.698 | 0.281 | 2.489 | 0.013 |
| urease<---pH | 0.141 | 0.366 | 0.387 | 0.004 |
| protease<---pH | 8.550 | 1.715 | 4.986 | *** |
| urease<---bacterial biomass | 0.000 | 0.000 | -0.343 | 0.186 |
| protease<---bacterial biomass | 0.000 | 0.000 | 4.211 | *** |
| urease<---bacterial community | 0.089 | 0.057 | 1.561 | 0.011 |
| protease<---bacterial community | 0.581 | 0.268 | 2.172 | 0.030 |
| FAA<---SOM | 7.487 | 2.689 | 2.784 | 0.001 |
| FAA<---pH | -73.565 | 18.498 | -3.977 | *** |
| FAA<---bacterial biomass | 0.000 | 0.000 | 4.481 | *** |
| FAA<---bacterial community | -9.419 | 2.429 | -3.878 | *** |
| FAA<---urease | 2.987 | 6.391 | 0.467 | 0.151 |
| FAA<---protease | 4.744 | 1.363 | 3.481 | *** |

*a): Non standardized regression coefficients of estimate.*

*b):Standard error of estimate.*

*c): critical ratio is the t values of T-test,* C.R.>1.96 *represents significant at 0.05* probability *levels.*

*d): P* value represents the significance level, ＊＊＊significant at 0.001 probability levels, *P* > 0.05 implied causal hypothetical pathways were false.

The release the path of *P*>0.05, delete urease to FAAs, bacterial biomass to urease, and get the modified model

**Table S3** Estimates of modified model coefficients for FAAs and its impact factors

| Item | Estimate a) | S.E.b) | C.R. c) | Pd) |
| --- | --- | --- | --- | --- |
| bacterial biomass<---SOM | 10045610.972 | 2527473.198 | 3.975 | *** |
| bacterial community<---SOM | 0.971 | 0.065 | 15.043 | *** |
| bacterial biomass<---pH | 133198688.758 | 31844847.118 | 4.183 | *** |
| bacterial community<---pH | -1.627 | 0.814 | -2.000 | 0.045 |
| protease<---SOM | 0.698 | 0.281 | 2.489 | 0.013 |
| protease<---pH | 8.550 | 1.715 | 4.986 | *** |
| protease<---bacterial biomass | 0.000 | 0.000 | 4.211 | *** |
| protease<---bacterial community | 0.581 | 0.268 | 2.172 | 0.030 |
| FAA<---SOM | 7.080 | 2.552 | 2.775 | 0.006 |
| FAA<---pH | -73.928 | 18.534 | -3.989 | *** |
| FAA<---bacterial biomass | 0.000 | 0.000 | 4.446 | *** |
| FAA<---bacterial community | -9.207 | 2.393 | -3.848 | *** |
| FAA<---protease | 4.836 | 1.352 | 3.576 | *** |

**Table S4** Fitting coefficients of the FAAs and its impact factors model

| Indices name | *χ*2/ df | RFI | RMSEA | NFI | TLI | CFI | IFI |
| --- | --- | --- | --- | --- | --- | --- | --- |
| Evaluation criterion | <3 | close to 1 | <0.05 | close to 1 | close to 1 | close to 1 | close to 1 |
| Results | 0.500 | 0.971 | 0 | 0.996 | 1.031 | 1 | 1.004 |


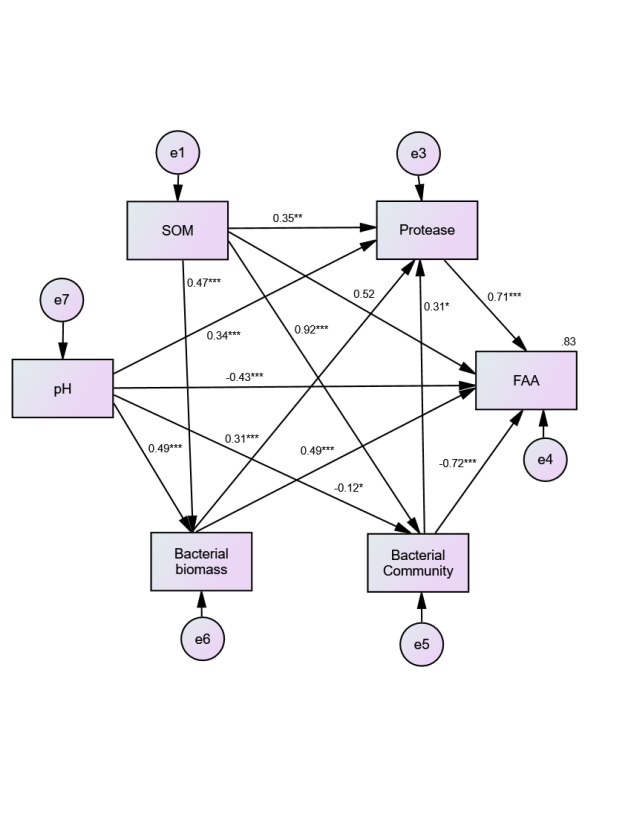


**Fig.S4.** Modified model for FAAs and its impact factors

**Table S5** Total effects of factors contributing to the variability of FAAs content

| Item | Direct Effectsa) | Indirect Effectsb) | Total Effectsc) |
| --- | --- | --- | --- |
| FAA <--- pH | -0.43 | 0.65 | 0.22 |
| FAA <--- SOM | 0.52 | 0.12 | 0.64 |
| FAA <--- bacterial biomass | 0.49 | 0.22 | 0.71 |
| FAA <--- bacterial community | -0.72 | 0.22 | -0.50 |
| FAA <--- protease | 0.71 | 0 | 0.71 |

Note：a): Standard path coefficients

b): The product of the direct effects path coefficients

c): The sum of direct effects and indirect effects

The absolute value of the path coefficient represents the size of the correlation, “-” represents a negative correlation
